# Supplementary material for: Bovine herpesvirus 1 tegument protein UL21 plays critical roles in viral secondary envelopment and cell-to-cell spreading
Source: PubMed Central journal article supplement (PMC5706888; doi:10.18632/oncotarget.21776), 2017-10-10
Supplement: oncotarget-08-94462-s001.pdf [file oncotarget-08-94462-s001.pdf]

# Bovine herpesvirus 1 tegument protein *UL21* plays critical roles in viral secondary envelopment and cell-to-cell spreading

## SUPPLEMENTARY MATERIALS

2015-11-16 2:34:1

RT: 0.00 - 60.01 SM: 7B

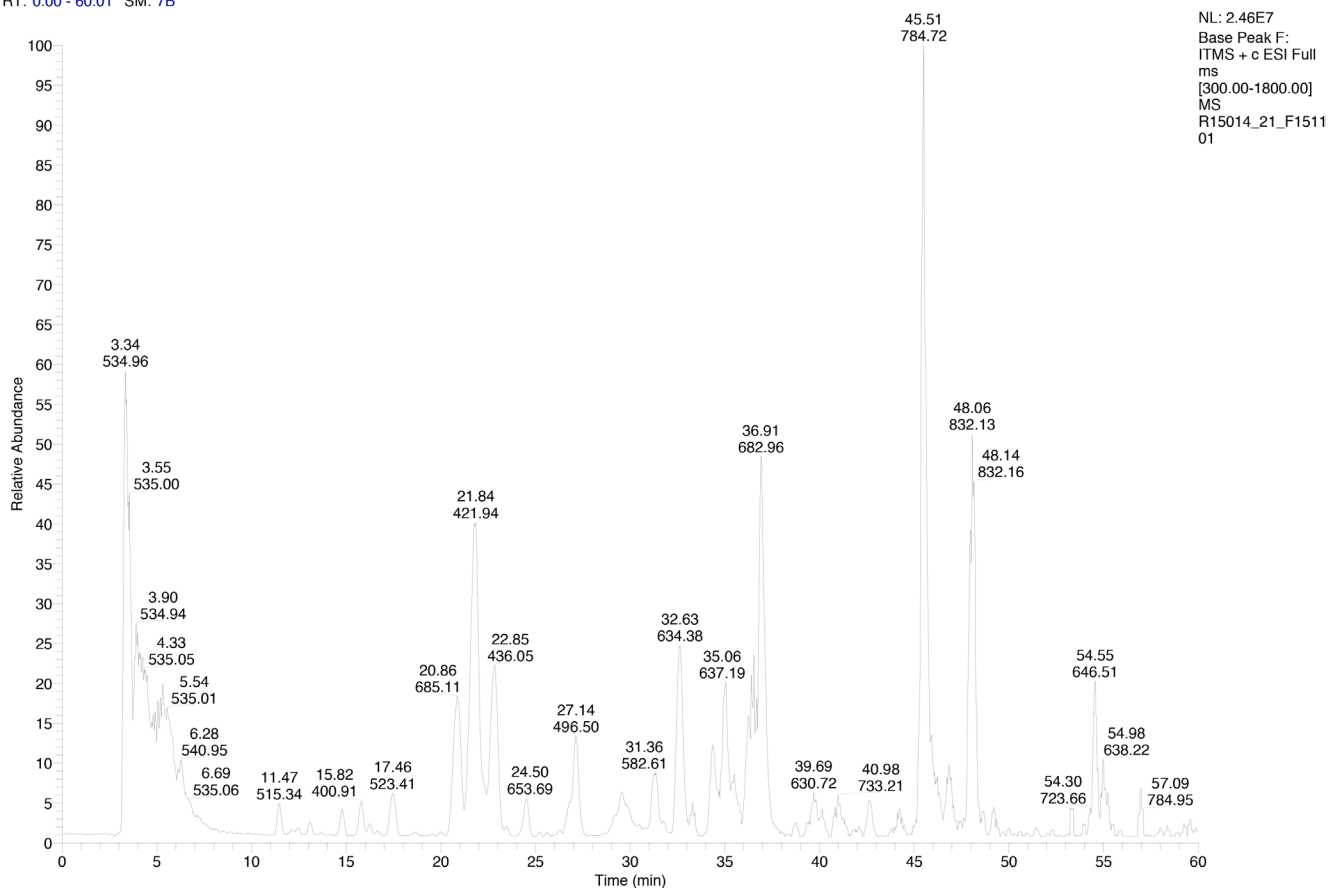

**Supplementary Material 1: Liquid chromatography-mass spectrometry (LC/MS) analysis of immunoprecipitated proteins.** Peptide mass spectra peak represents the tryptic peptide obtained from LC-MS analysis. The x axis indicates the time and the y axis represent the relative abundance. Molecular masses of the peptides calculated based on their mass-to-charge ( $m/z$ ) values.

**Supplementary Material 2: Liquid chromatography-mass spectrometry (LC/MS) analysis of immunoprecipitated proteins along with the interacting proteins that correspond to the proteins**

See Supplementary File 1
